# Supplementary material for: Machine Learning Algorithm Accuracy Using Single- versus Multi-Institutional Image Data in the Classification of Prostate MRI Lesions
Source: MDPI journal article supplement (doi:10.3390/app13021088), 2023-01-13
Supplement: s1 [file s1]

## Supplementary Materials:

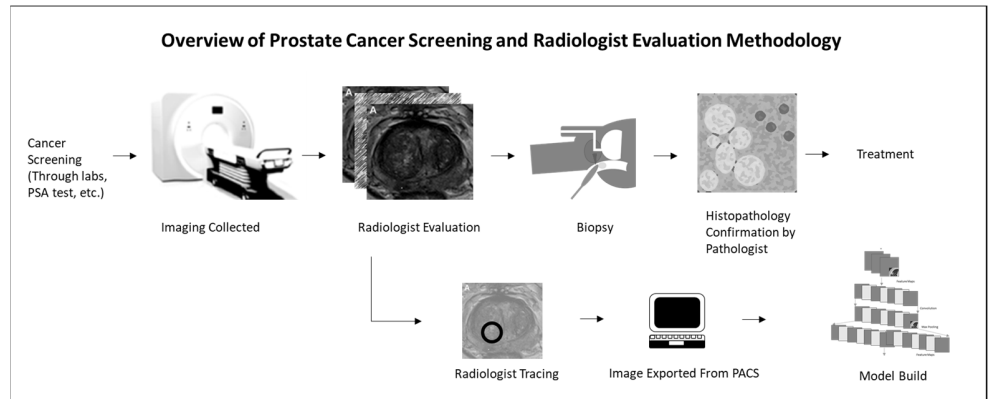

**Figure S1.** Overview of prostate cancer screening and Radiologist evaluation methodology on local dataset.

**Table S1.** Overview of total parameters and description of model layers for model developed on ProstateX using transfer learning on the ResNet model with Imagenet weights from the TensorFlow applications package. The ReLU activation function was used for each layer with a binary cross-entropy loss function. The “optimizers RMSprop” optimizer was used with a learning rate of 2e-5.

| Model: "sequential_11"            |                |           |
|-----------------------------------|----------------|-----------|
| Layer (type)                      | Output Shape   | Param #   |
| functional_23 (Functional)        | (None, 524288) | 23587712  |
| dense_73 (Dense)                  | (None, 512)    | 268435968 |
| dropout_35 (Dropout)              | (None, 512)    | 0         |
| dense_74 (Dense)                  | (None, 512)    | 262656    |
| dropout_36 (Dropout)              | (None, 512)    | 0         |
| dense_75 (Dense)                  | (None, 512)    | 262656    |
| dropout_37 (Dropout)              | (None, 512)    | 0         |
| dense_76 (Dense)                  | (None, 512)    | 262656    |
| dropout_38 (Dropout)              | (None, 512)    | 0         |
| dense_77 (Dense)                  | (None, 1)      | 513       |
| Total params: 292,812,161         |                |           |
| Trainable params: 269,224,449     |                |           |
| Non-trainable params: 23,587, 712 |                |           |

**Table S2.** Overview of code used to create algorithms for each training set.

```

#Package Imports
import tensorflow as tf
from tensorflow import keras
from keras.applications.resnet50 import ResNet50
from tensorflow.keras import models
from tensorflow.keras.layers import Conv2D, MaxPooling2D, Flatten, Dense, Dropout, InputLayer
from tensorflow.keras.models import Sequential
from tensorflow.keras import optimizers
  
```

```

#Parameters
batch_size = 32
IMG_HEIGHT = 512
IMG_WIDTH = 512

#training dataset = aug_ds and validation set = val_ds

#Prepare the model, for this we're using a pretrained model on "imagenet" data
modnet = modeltype
output = modnet.layers[-1].output
output2 = keras.layers.Flatten()(output)
modnet = keras.Model(modnet.input, outputs=output2)

#Set layers to not trainable to just use the last layer for transfer learning and provide a preliminary summary
for layer in modnet.layers:
    layer.trainable = False
modnet.summary()

model = Sequential()
model.add(modnet)

model.add(Dense(512, activation='relu', input_dim=(IMG_HEIGHT,IMG_WIDTH,3)))
model.add(Dropout(0.3))

model.add(Dense(512, activation='relu', input_dim=(IMG_HEIGHT,IMG_WIDTH,3)))
model.add(Dropout(0.3))

model.add(Dense(512, activation='relu', input_dim=(IMG_HEIGHT,IMG_WIDTH,3)))
model.add(Dropout(0.3))

model.add(Dense(512, activation='relu', input_dim=(IMG_HEIGHT,IMG_WIDTH,3)))
model.add(Dropout(0.3))

model.compile(loss='binary_crossentropy',
              optimizer=optimizers.RMSprop(lr=2e-5),
              metrics=['accuracy', 'mean_absolute_error', 'mean_squared_error'])
model.summary()

history = model.fit(aug_ds.repeat(),
                  steps_per_epoch=int(100/batch_size),
                  epochs=epocsnum,
                  validation_data=val_ds.repeat(),
                  validation_steps=int(50/batch_size),
                  callbacks=[csv_logger, time_callback])

```

**Table S3.** Overview of equations used within ResNet model and validation tests.

| Overview                   | Equation                                                                                             |
|----------------------------|------------------------------------------------------------------------------------------------------|
| ReLu Activation Function   | $f(x) = \max(0, X)$                                                                                  |
| RMSProp Optimizer Function | $w_{t+1} = w_t + (- (L_r / \sqrt{\text{ExpAvgG}}) * G)$<br>Where G is the Gradient at time t along w |
| t-test                     | $t = (m - v) / (S / \sqrt{n})$<br>Where m = mean, v = value, S = StDev, and n = Sample size          |

**Table S4.** Table 3 including Standard Deviations.

| ResNet Model         | Training image source | Testing image source | Training & testing image sequence |                    |                    |                    |                    |                    |
|----------------------|-----------------------|----------------------|-----------------------------------|--------------------|--------------------|--------------------|--------------------|--------------------|
|                      |                       |                      | T2                                |                    | ADC                |                    | T2 & ADC           |                    |
|                      |                       |                      | AUC                               | Accuracy           | AUC                | Accuracy           | AUC                | Accuracy           |
| Model <sup>PX2</sup> | PX2 (89)              | PX2*                 | 0.93 ± 0.01                       | 0.91 ± 0.03        | 0.91 ± 0.01        | 0.88 ± 0.01        | 0.95 ± 0.01        | 0.90 ± 0.01        |
|                      |                       | Local <sup>†</sup>   | <u>0.49 ± 0.01</u>                | <u>0.53 ± 0.02</u> | <u>0.23 ± 0.00</u> | <u>0.48 ± 0.00</u> | <u>0.46 ± 0.04</u> | <u>0.55 ± 0.03</u> |
|                      |                       | PXL <sup>†</sup>     | <u>0.87 ± 0.01</u>                | <u>0.79 ± 0.01</u> | <u>0.80 ± 0.02</u> | <u>0.78 ± 0.02</u> | <u>0.78 ± 0.03</u> | <u>0.80 ± 0.02</u> |
| Model <sup>Loc</sup> | Local                 | Local*               | 0.96 ± 0.01                       | 0.89 ± 0.02        | 0.82 ± 0.01        | 0.82 ± 0.00        | 0.98 ± 0.01        | 0.92 ± 0.02        |
|                      |                       | PX2 <sup>†</sup>     | <u>0.50 ± 0.01</u>                | <u>0.54 ± 0.01</u> | <u>0.49 ± 0.01</u> | <u>0.49 ± 0.00</u> | <u>0.41 ± 0.02</u> | <u>0.51 ± 0.01</u> |
|                      |                       | PXL <sup>†</sup>     | <u>0.77 ± 0.01</u>                | <u>0.71 ± 0.01</u> | 0.84 ± 0.01        | 0.84 ± 0.00        | 0.94 ± 0.3         | 0.87 ± 0.03        |
| Model <sup>PXL</sup> | PXL                   | PXL*                 | 0.83 ± 0.01                       | 0.89 ± 0.01        | 0.98 ± 0.02        | 0.92 ± 0.01        | 0.96 ± 0.01        | 0.93 ± 0.02        |
|                      |                       | PX2 <sup>†</sup>     | <u>0.92 ± 0.02</u>                | 0.92 ± 0.02        | <u>0.85 ± 0.01</u> | 0.91 ± 0.00        | <u>0.85 ± 0.01</u> | 0.93 ± 0.04        |
|                      |                       | Local <sup>†</sup>   | <u>0.96 ± 0.01</u>                | 0.86 ± 0.03        | <u>0.88 ± 0.02</u> | 0.92 ± 0.01        | 0.99 ± 0.05        | 0.92 ± 0.05        |

**Table S5.** Standard Deviations for Table 4.

| ResNet Algorithm     | Training image source | Testing image source | Training & testing image sequence |             |             |             |             |             |             |             |             |             |             |             |      |      |
|----------------------|-----------------------|----------------------|-----------------------------------|-------------|-------------|-------------|-------------|-------------|-------------|-------------|-------------|-------------|-------------|-------------|------|------|
|                      |                       |                      | T2                                |             |             |             | ADC         |             |             |             | T2 & ADC    |             |             |             |      |      |
|                      |                       |                      | AUC                               |             | Accuracy    |             | AUC         |             | Accuracy    |             | AUC         |             | Accuracy    |             |      |      |
|                      |                       |                      | PZ                                | TZ          | PZ          | TZ          | PZ          | TZ          | PZ          | TZ          | PZ          | TZ          | PZ          | TZ          |      |      |
| Model <sup>PX2</sup> | PX2                   | PX2*                 | 0.92                              | 0.93        | 0.91        | 0.90        | 0.91        | 0.91        | 0.88        | 0.88        | 0.94        | 0.95        | 0.91        | 0.90        |      |      |
|                      |                       |                      | ±                                 | ±           | ±           | ±           | ±           | ±           | ±           | ±           | ±           | ±           | ±           | ±           |      |      |
|                      |                       |                      | 0.01                              | 0.01        | 0.00        | 0.03        | 0.01        | 0.01        | 0.01        | 0.01        | 0.01        | 0.01        | 0.01        | 0.01        |      |      |
|                      |                       | Local <sup>†</sup>   | <u>0.44</u>                       | <u>0.61</u> | <u>0.53</u> | <u>0.55</u> | <u>0.23</u> | <u>0.25</u> | <u>0.48</u> | <u>0.48</u> | <u>0.45</u> | <u>0.31</u> | <u>0.44</u> | <u>0.44</u> |      |      |
|                      |                       |                      | ±                                 | ±           | ±           | ±           | ±           | ±           | ±           | ±           | ±           | ±           | ±           | ±           |      |      |
|                      |                       |                      | <u>0.01</u>                       | <u>0.00</u> | <u>0.01</u> | <u>0.02</u> | <u>0.01</u> | <u>0.02</u> | <u>0.00</u> | <u>0.01</u> | <u>0.01</u> | <u>0.02</u> | <u>0.01</u> | <u>0.00</u> |      |      |
|                      |                       | PXL <sup>†</sup>     | 0.88                              | 0.87        | <u>0.8</u>  | <u>0.77</u> | <u>0.80</u> | <u>0.81</u> | <u>0.77</u> | <u>0.80</u> | <u>0.77</u> | <u>0.79</u> | <u>0.80</u> | <u>0.80</u> |      |      |
|                      |                       |                      | ±                                 | ±           | ±           | ±           | ±           | ±           | ±           | ±           | ±           | ±           | ±           | ±           |      |      |
|                      |                       |                      | 0.01                              | 0.03        | <u>0.01</u> | <u>0.01</u> | <u>0.01</u> | <u>0.01</u> | <u>0.02</u> | <u>0.01</u> | <u>0.01</u> | <u>0.02</u> | <u>0.01</u> | <u>0.02</u> |      |      |
|                      |                       | Model <sup>Loc</sup> | Local                             | Local*      | 0.88        | 0.99        | 0.86        | 0.89        | 0.82        | 0.81        | 0.84        | 0.80        | 0.95        | 0.96        | 0.90 | 0.94 |
|                      |                       |                      |                                   |             | ±           | ±           | ±           | ±           | ±           | ±           | ±           | ±           | ±           | ±           | ±    | ±    |
|                      |                       |                      |                                   |             | 0.01        | 0.03        | 0.01        | 0.01        | 0.01        | 0.02        | 0.01        | 0.03        | 0.01        | 0.03        | 0.02 | 0.04 |
| PX2 <sup>†</sup>     | <u>0.48</u>           |                      |                                   | <u>0.52</u> | <u>0.53</u> | <u>0.55</u> | <u>0.54</u> | <u>0.45</u> | <u>0.49</u> | <u>0.48</u> | <u>0.55</u> | <u>0.29</u> | <u>0.57</u> | <u>0.46</u> |      |      |
|                      | ±                     |                      |                                   | ±           | ±           | ±           | ±           | ±           | ±           | ±           | ±           | ±           | ±           | ±           |      |      |
|                      | <u>0.02</u>           |                      |                                   | <u>0.01</u> | <u>0.02</u> | <u>0.01</u> | <u>0.02</u> | <u>0.01</u> | <u>0.02</u> | <u>0.02</u> | <u>0.01</u> | <u>0.02</u> | <u>0.01</u> | <u>0.02</u> |      |      |
| PXL <sup>†</sup>     | <u>0.79</u>           |                      |                                   | <u>0.69</u> | <u>0.79</u> | <u>0.70</u> | <u>0.94</u> | <u>0.72</u> | 0.84        | 0.80        | <u>0.89</u> | <u>0.94</u> | <u>0.83</u> | 0.88        |      |      |
|                      | ±                     |                      |                                   | ±           | ±           | ±           | ±           | ±           | ±           | ±           | ±           | ±           | ±           | ±           |      |      |
|                      | <u>0.02</u>           |                      |                                   | <u>0.02</u> | <u>0.01</u> | <u>0.03</u> | <u>0.02</u> | <u>0.01</u> | 0.01        | 0.02        | 0.04        | 0.02        | <u>0.02</u> | 0.02        |      |      |
| Model <sup>PXL</sup> | PXL                   |                      |                                   | PXL*        | 0.83        | 0.92        | 0.89        | 0.90        | 0.98        | 0.99        | 0.92        | 0.93        | 0.96        | 0.90        | 0.91 | 0.98 |
|                      |                       |                      |                                   |             | ±           | ±           | ±           | ±           | ±           | ±           | ±           | ±           | ±           | ±           | ±    | ±    |
|                      |                       |                      |                                   |             | 0.01        | 0.02        | 0.02        | 0.02        | 0.01        | 0.02        | 0.01        | 0.01        | 0.01        | 0.01        | 0.01 | 0.03 |
|                      |                       | PX2 <sup>†</sup>     | <u>0.93</u>                       | 0.92        | 0.92        | 0.92        | <u>0.88</u> | <u>0.85</u> | 0.92        | 0.90        | <u>0.85</u> | <u>0.86</u> | 0.93        | 0.92        |      |      |
|                      |                       |                      | ±                                 | ±           | ±           | ±           | ±           | ±           | ±           | ±           | ±           | ±           | ±           | ±           |      |      |
|                      |                       |                      | <u>0.01</u>                       | 0.01        | 0.01        | 0.01        | <u>0.96</u> | 0.95        | 0.94        | <u>0.78</u> | 0.99        | 0.97        | 0.92        | 0.92        |      |      |
|                      |                       | Local <sup>†</sup>   | ±                                 | ±           | ±           | ±           | <u>0.90</u> | <u>0.88</u> | 0.92        | 0.91        | 0.99        | 0.97        | 0.92        | 0.92        |      |      |
|                      |                       |                      | ±                                 | ±           | ±           | ±           | ±           | ±           | ±           | ±           | ±           | ±           | ±           | ±           |      |      |
|                      |                       |                      | <u>0.01</u>                       | 0.02        | 0.03        | <u>0.01</u> |             |             |             |             |             |             |             |             |      |      |
